# Supplementary material
Source: bioRxiv or medRxiv preprint supplement (https://www.medrxiv.org/highwire/filestream/89297/field_highwire_adjunct_files/1/2020.05.27.20115238-2.pdf)
Supplement: Supplementary file [file 2020.05.27.20115238-2.pdf]

SUPPLEMENTARY TABLE 2: OTHER AGENTS. The interventions are listed by class. The setting of each study, whether hospital or outpatient, the type of control (AC: Active control, RCT: randomized control; soc: standard of care; PLAC: placebo control, whether treatment (TREAT) or prevention (PREV), the severity of illness, number of subjects, quarter study initiated, quarter study projects completion of enrollment, and duration of symptoms for patient inclusion are listed. Studies projecting completion of enrollment by the end of the second quarter of 2020 are bolded. Outpatient studies with planned completion by the end of the second quarter of 2020 are italicized.

| TREATMENT              | TYPE OF CONTROL                  | TREAT OR PREVENT    | SEVERITY       | NUMBER SUBJECTS  | BEGIN DATE    | PROPOSED END ENROLLMENT | DURATION SYMPTOMS |
|------------------------|----------------------------------|---------------------|----------------|------------------|---------------|-------------------------|-------------------|
| <b>IMMUNE GLOBULIN</b> |                                  |                     |                |                  |               |                         |                   |
| CONVALESCENT PLASMA    | RCT PLAC                         | TREAT               | MIXED          | 500              | Q2(20)        | Q2(21)                  | 14                |
|                        | RCT (soc)                        | TREAT               | MIXED          | 426              | Q2(20)        | Q3 (20)                 | 4                 |
|                        | RCT (soc)                        | TREAT               | MIXED          | 278              | Q2(20)        | Q3 (20)                 | 12                |
|                        | RCT (soc)                        | TREAT               | SEV            | 200              | Q1(20)        | Q1(21)                  | 3                 |
|                        | RCT (soc)                        | TREAT               | SEV,CRIT       | 100              | Q1(20)        | <b>Q2(20)</b>           | ANY DUR           |
| IVIG                   | RCT (PLAC)                       | TREAT               | SEV,CRIT       | 138              | Q2(20)        | Q3 (20)                 | ANY DUR           |
| <b>CELL THERAPY</b>    |                                  |                     |                |                  |               |                         |                   |
| STEM CELL              | RCT(PLAC)                        | PREV                | HEALTHY        | 100              | Q2(20)        | Q4(20)                  | N/A               |
|                        | Case control                     | TREAT               | MIXED          | 200              | Q1(20)        | Q4(21)                  | ANY DUR           |
|                        | RCT(PLAC)                        | TREAT               | SEV            | 120              | Q1(20)        | Q2(20)                  | ANY DUR           |
| <b>CARDIOVASCULAR</b>  |                                  |                     |                |                  |               |                         |                   |
| DISCONTINUATION OF RAS | AC (continue or discontinue RAS) | TREAT(2)<br>PREV(1) | MIXED, HEALTHY | 554;500;241<br>4 | Q2(20),Q1(20) | Q3 (20);Q4(20);Q1(21)   | ANY DUR, N/A      |
| LOSARTAN               | RCT (soc)                        | TREAT               | MIXED          | 100              | COMPLETE<br>D |                         |                   |
|                        | RCT (soc)                        | TREAT               | MILD,MOD       | 200              | Q2(20)        | Q3 (20)                 | ANY DUR           |
|                        | RCT (soc)                        | TREAT               | MILD,MOD       | 580              | Q2(20)        | Q2(21)                  | 3                 |
|                        | RCT (soc)                        | TREAT               | SEV,CRIT       | 200              | Q2(20)        | Q2(21)                  | ANY DUR           |
| TELMISARTAN            | RCT(soc)                         | TREAT               | MIXED          | 400              | Q2(20)        | Q3 (20)                 | ANY DUR           |
| VALSARTAN              | RCT (PLAC)                       | TREAT               | MOD            | 651              | Q2(20)        | Q3 (20)                 | 1                 |

|                                      |                                        |          |             |         |        |                |         |
|--------------------------------------|----------------------------------------|----------|-------------|---------|--------|----------------|---------|
| AMIODARONE                           | AC(verapamil)                          | TREAT    | MIXED       | 804     | Q2(20) | Q1(21)         | ANY DUR |
| <b>PULMONARY TREATMENT</b>           |                                        |          |             |         |        |                |         |
| PIRFENIDONE                          | RCT (soc)                              | TREAT    | MIXED       | 294     | Q1(20) | <b>Q2(20)</b>  | 7       |
|                                      | RCT (soc)                              | TREAT    | SEV,CRIT    | 292     | Q1(20) | Q3(20)         | 14      |
| HYPERBARIC OXYGEN                    | RCT (soc)                              | TREAT    | MIXED       | 100     | Q2(20) | Q2(21)         | ANY DUR |
| INHALED NITRIC OXIDE                 | RCT(soc)                               | TREAT    | MIXED       | 240     | Q1(20) | Q2(21)         | ANY DUR |
|                                      | RCT(soc)                               | TREAT    | SEV,CRIT    | 200     | Q1(20) | Q2(21)         | ANY DUR |
| DORNASE ALFA (cystic fibrosis agent) | RCT (soc)                              | TREAT    | CRIT        | 100     | Q2(20) | Q4(20)         | ANY DUR |
| PRONE POSITION                       | AC(supine)                             | TREAT(2) | CRIT; MIXED | 248;300 | Q2(20) | Q4(20); Q1(21) | ANY DUR |
| OZONE                                | RCT (soc)                              | TREAT    | MIXED       | 180     | Q1(20) | <b>Q2 (20)</b> | 7       |
| OXYGEN/HYDROGEN                      | AC (oxygen)                            | TREAT(2) | MOD,SEV     | 100;440 | Q1(20) | Q3 (20)        | ANY DUR |
| SURGICAL FACE MASK                   | AC(face mask or none)                  | PREV     | HEALTHY     | 6000    | Q2(20) | Q3 (20)        | N/A     |
| CLOSED LOOP OXYGEN                   | AC (normal O2 delivery vs closed loop) | TREAT    | MOD,SEV     | 216     | Q2(20) | Q4(20)         | ANY DUR |
| RESPIRATORY COACHING                 | RCT (soc)                              | TREAT    | MILD,MOD    | 270     | Q1(20) | Q3 (20)        | ANY DUR |
| <b>ONCOLOGIC AGENTS</b>              |                                        |          |             |         |        |                |         |
| IMATINIB                             | RCT (PLAC)                             | TREAT(2) | SEV         | 304;386 | Q1(20) | <b>Q2 (20)</b> | ANY DUR |
| LY3127804                            | RCT (PLAC)                             | TREAT    | MIXED       | 200     | Q2(20) | Q3 (20)        | ANY DUR |
| BEVACIZUMAB                          | RCT (soc)                              | TREAT    | SEV,CRIT    | 140     | Q1(20) | <b>Q2(20)</b>  | ANY DUR |

**METABOLIC AGENTS**

|                 |            |       |          |     |        |                |         |
|-----------------|------------|-------|----------|-----|--------|----------------|---------|
| METFORMIN       | RCT (soc)  | TREAT | MIXED    | 200 | Q1(20) | <b>Q2 (20)</b> | ANY DUR |
| DAPLIGLIFLOZIN  | RCT (PLAC) | TREAT | MILD,MOD | 900 | Q2(20) | Q4(20)         | 3       |
| ESTRADIOL       | RCT (soc)  | TREAT | MILD,MOD | 110 | Q2(20) | Q4(20)         | 7       |
| ATORVASTATIN    | RCT (soc)  | TREAT | MIXED    | 100 | Q2(20) | NO DATE        | ANY DUR |
| MEDIUM CHAIN TG | RCT (soc)  | TREAT | MILD     | 120 | Q2(20) | <i>Q2 (20)</i> | ANY DUR |

#### SUPPLEMENTS

|                      |                                           |            |               |             |               |                 |            |
|----------------------|-------------------------------------------|------------|---------------|-------------|---------------|-----------------|------------|
| ECHINACEA AND GINGER | RCT (soc)                                 | TREAT      | MILD          | 100         | Q2(20)        | <b>Q2 (20)</b>  | ANY DUR    |
| VITAMIN D            | AC (200,000 IU vs 50,000 IU),<br>RCT(soc) | TREAT(3)   | MILD,MOD      | 260;260;540 | Q2(20)        | Q3 (20), Q4(20) | 3, ANY DUR |
| ASCORBIC ACID        | RCT (PLAC)                                | TREAT      | CRIT          | 140         | Q1(20)        | Q3 (20)         | ANY DUR    |
| ASCORBIC ACID, ZINC  | AC(ascorbic acid, zinc, soc)              | TREAT      | MILD          | 520         | Q2(20)        | Q3 (20)         | ANY DUR    |
| LIPOIC ACID          | RCT (soc)                                 | TREAT      | MIXED         | 394         | Q1(20)        | <b>Q2 (20)</b>  | ANY DUR    |
| PROBIOTICS           | RCT (soc);RCT(PLAC)                       | TREAT;PREV | MIXED;HEALTHY | 300;314     | Q1(20);Q2(20) | Q3 (20)         | ANY DUR    |
| NATURAL HONEY        | RCT (soc)                                 | TREAT      | MIXED         | 1000        | Q1(20)        | Q4(20)          | ANY DUR    |
| ESCIN                | RCT (soc)                                 | TREAT      | MIXED         | 120         | Q1(20)        | <b>Q2 (20)</b>  | ANY DUR    |
| Crostop/Croguard     | RCT (soc)                                 | TREAT      | MIXED         | 150         | Q1(20)        | <b>Q2 (20)</b>  | ANY DUR    |
| VITAMIN A            | RCT (soc)                                 | TREAT      | MIXED         | 140         | Q2(20)        | NO DATE         | ANY DUR    |

#### NEUROGENIC

|             |            |       |          |     |        |         |         |
|-------------|------------|-------|----------|-----|--------|---------|---------|
| TRADIPITANT | RCT (PLAC) | TREAT | SEV,CRIT | 300 | Q2(20) | Q3 (20) | ANY DUR |
|-------------|------------|-------|----------|-----|--------|---------|---------|

|                              |                                  |          |          |         |        |                |           |
|------------------------------|----------------------------------|----------|----------|---------|--------|----------------|-----------|
| PYRIDOSTIGMINE               | RCT (PLAC)                       | TREAT    | SEV      | 436     | Q2(20) | Q2(21)         | ANY DUR   |
| VAZEGEPANT                   | RCT (PLAC)                       | TREAT    | SEV      | 120     | Q2(20) | Q3 (20)        | ANY DUR   |
| <b>PSYCHOLOGICAL</b>         |                                  |          |          |         |        |                |           |
| FLUVOXAMINE                  | RCT (PLAC)                       | TREAT    | MILD     | 152     | Q2(20) | Q3 (20)        | ANY DUR   |
| PSYCHOLOGICAL THERAPY        | RCT (soc)                        | TREAT    | MIXED    | 180     | Q1(20) | Q1(22)         | ANY DUR   |
| <b>GLUCOCORTICOIDS</b>       |                                  |          |          |         |        |                |           |
| METHYLPREDNISOLONE           | AC (high vs low dose)            | TREAT    | SEV      | 100     | Q1(20) | Q2 (20)        | ANY DUR   |
| CORTICOSTEROID               | AC (early vs late vs no steroid) | TREAT    | MIXED    | 200     | Q1(20) | Q2 (20)        | ANY DUR   |
| DEXAMETHASONE                | RCT (soc)                        | TREAT(2) | CRIT     | 290;200 | Q2(20) | Q3 (20),Q4(20) | 1,ANY DUR |
| CICLESONIDE                  | RCT (PLAC)                       | TREAT    | SEV      | 120     | Q2(20) | Q3 (20)        | ANY DUR   |
| SYMBICORT                    | RCT (soc)                        | TREAT    | MIXED    | 436     | Q2(20) | Q3 (20)        | 2         |
| <b>ANTICOAGULATION</b>       |                                  |          |          |         |        |                |           |
| ASPIRIN                      | RCT (soc)                        | TREAT    | MIXED    | 128     | Q1(20) | Q2 (20)        | ANY DUR   |
| LOW MOLECULAR WEIGHT HEPARIN | AC(lmw vs mechanical VTE prev)   | PREV     | MIXED    | 120     | Q1(20) | Q2 (20)        | ANY DUR   |
| DEFIBROTIDE                  | RCT (PLAC)                       | TREAT    | SEV,CRIT | 120     | Q2(20) | Q3 (20)        | ANY DUR   |
| ULINASTATIN                  | RCT (soc)                        | TREAT    | MIXED    | 100     | Q1(20) | Q2 (20)        | ANY DUR   |
